# Supplementary material
Source: ML conference proceedings conference paper supplement (https://openreview.net/forum?id=TEwhvliH1rA)
Supplement: supplementary_material [file attachment]

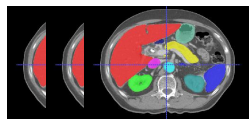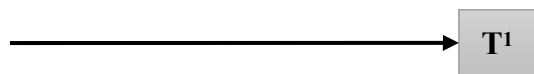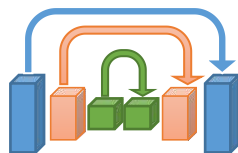

Cross Entropy  
and Dice Loss

$T^n$  Augmentation

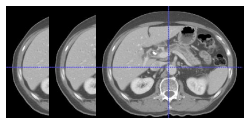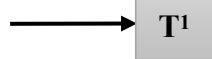

Student

*EMA*

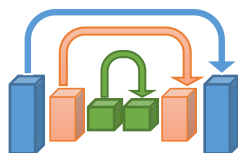

Teacher

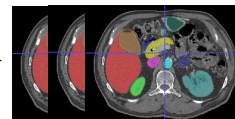

Input images

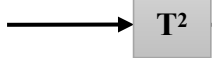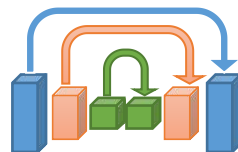

Student

Consistence  
Loss
