# Supplementary material
Source: ML conference proceedings conference paper supplement (https://openreview.net/forum?id=TEwhvliH1rA)

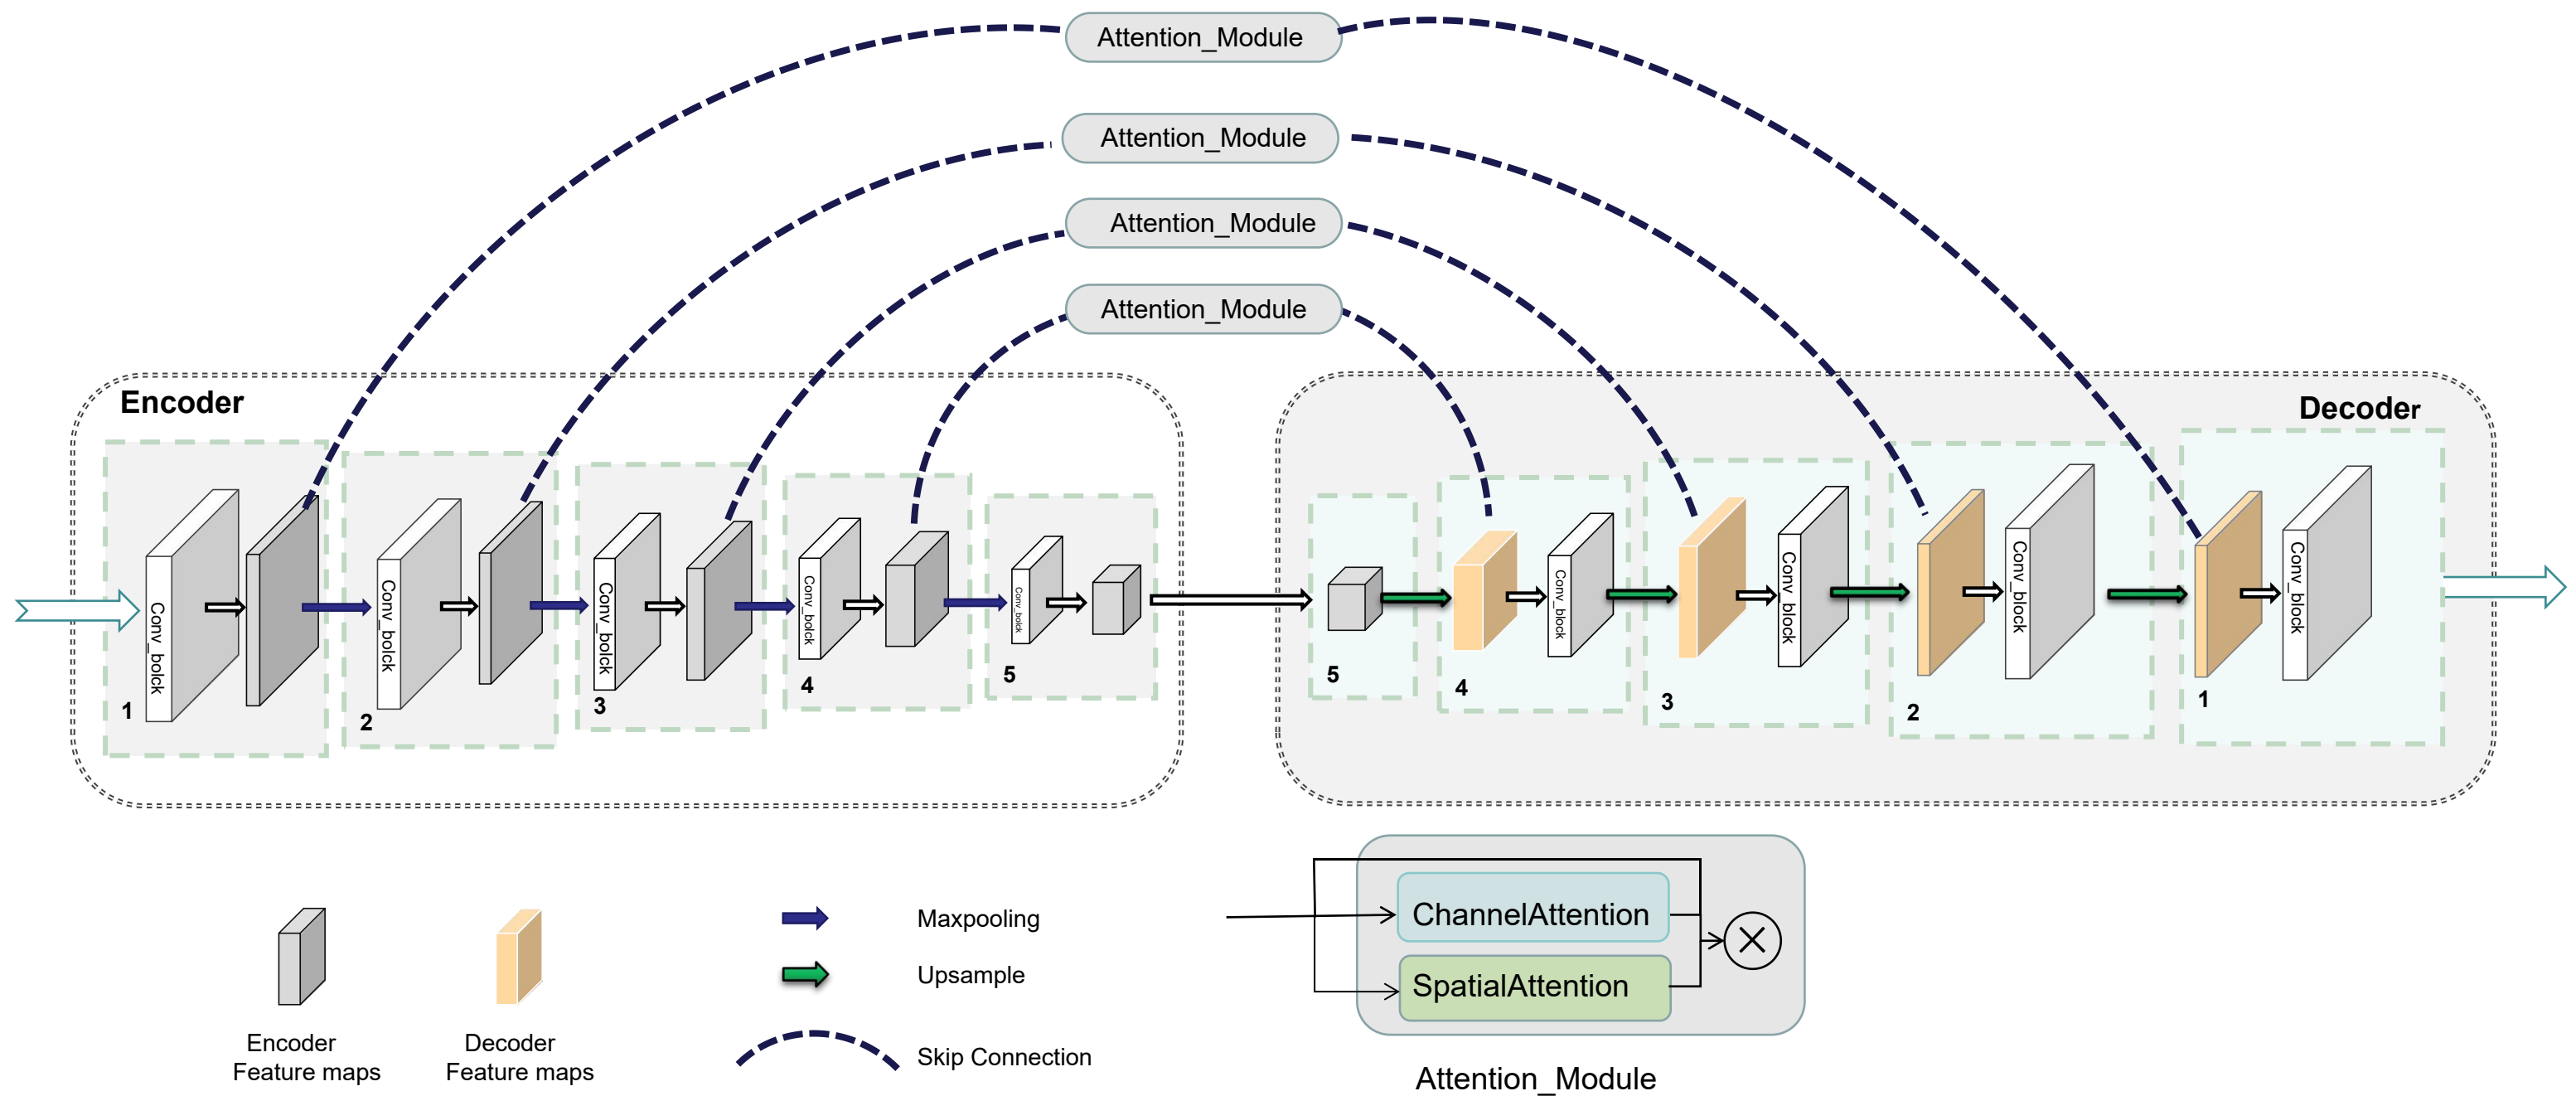

Supplement: supplementary_material [file attachment]

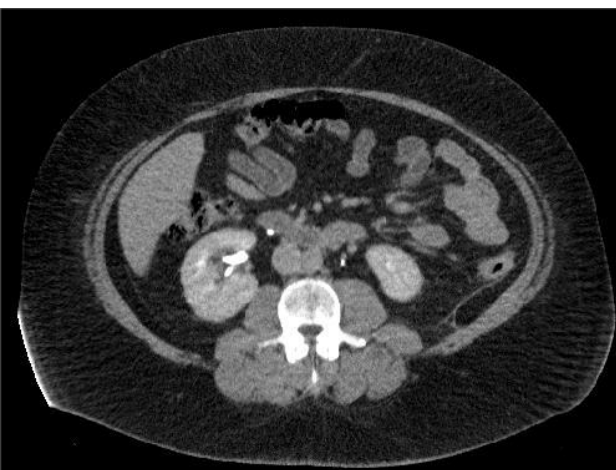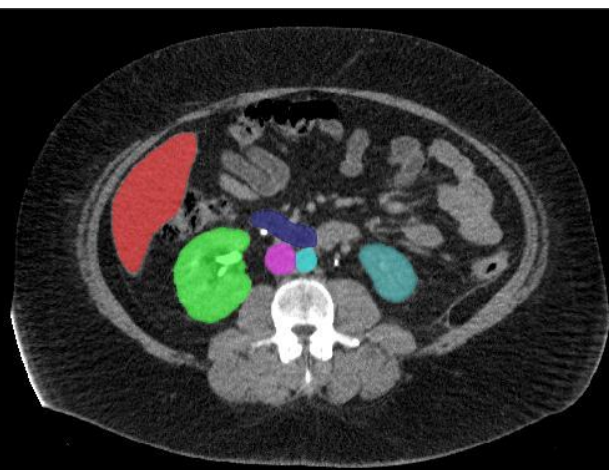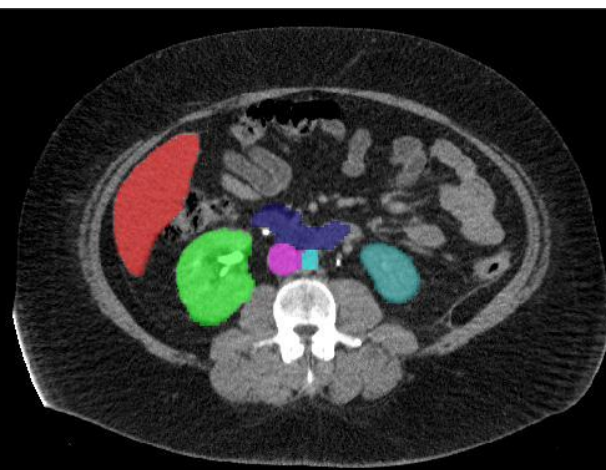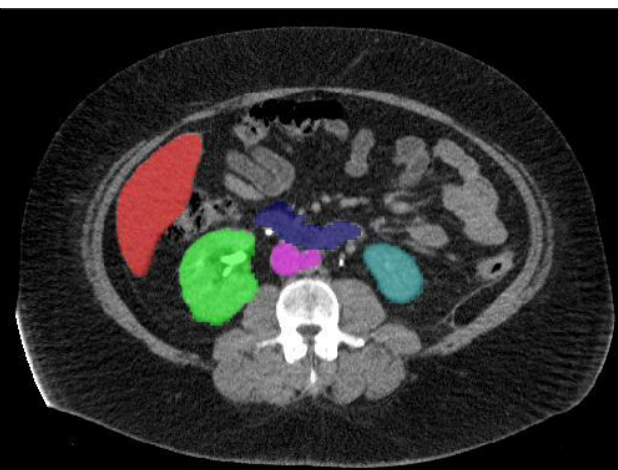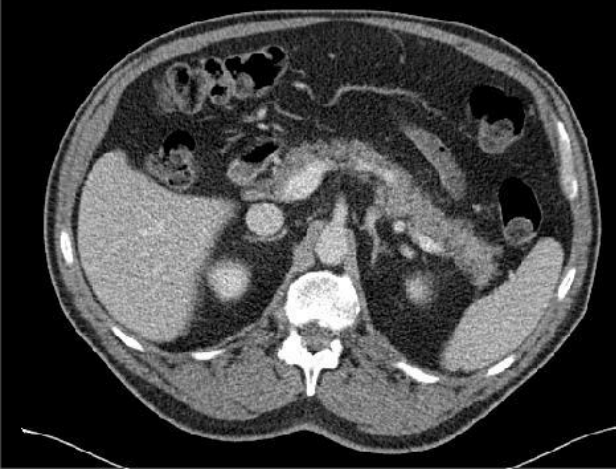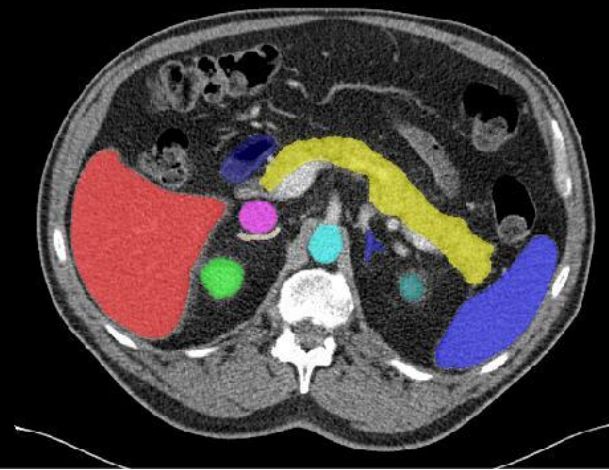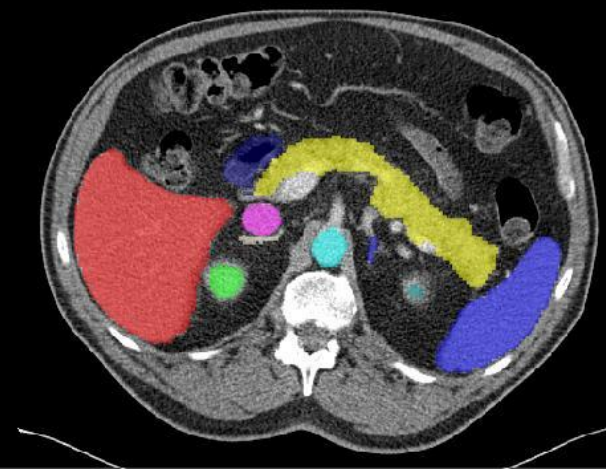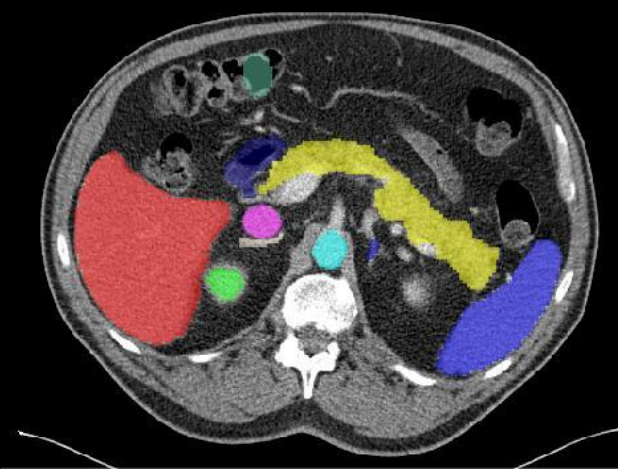

(a) Image

(b) Ground truth

(c) Semi-Supervised

(d) Supervised

Supplement: supplementary_material [file attachment]

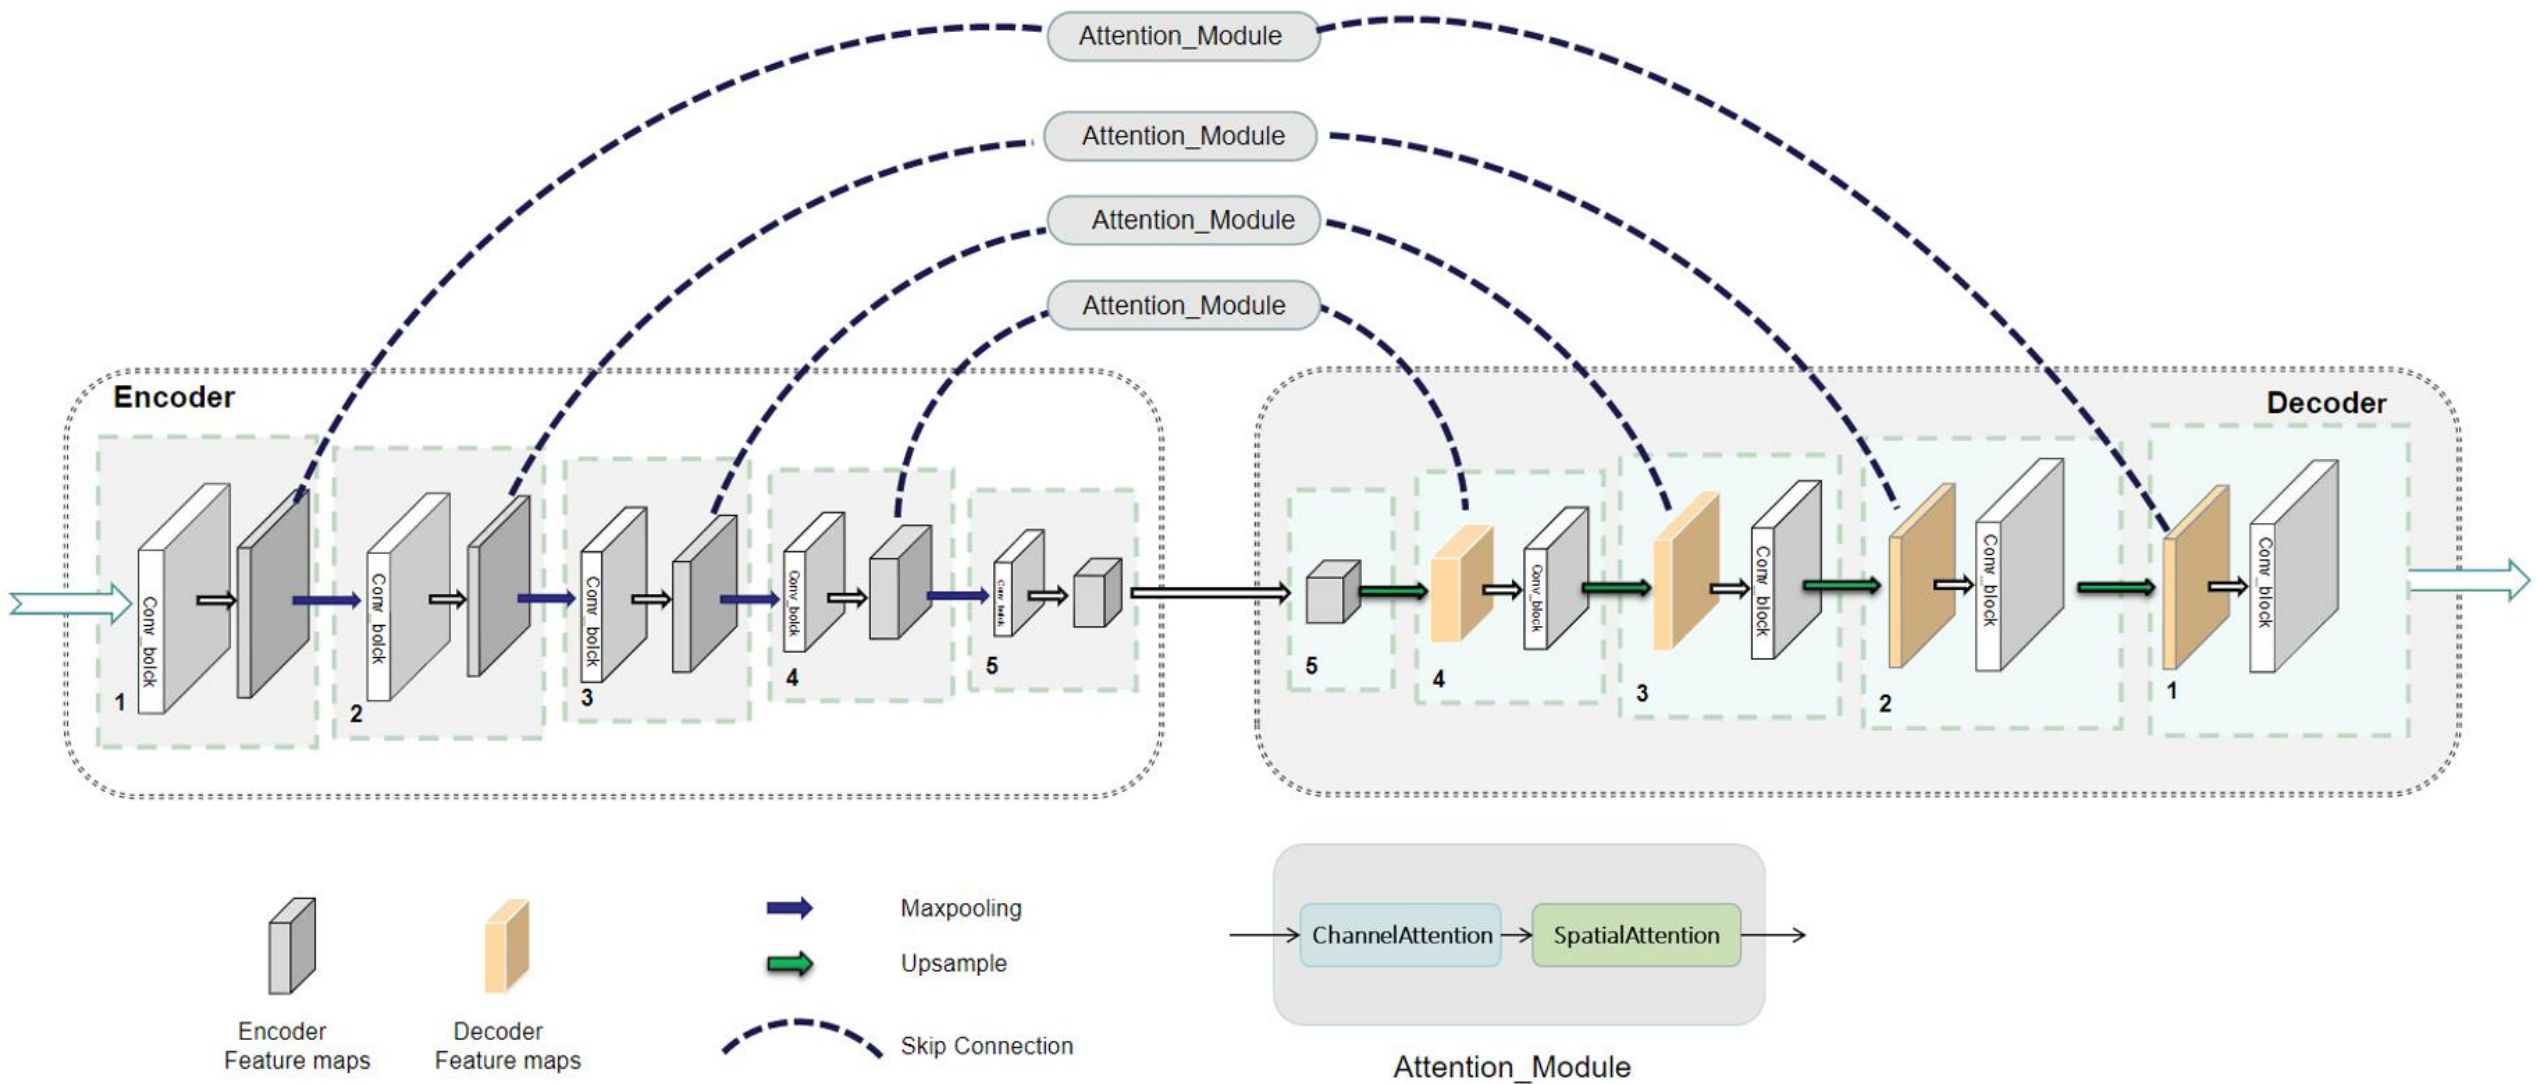

Supplement: supplementary_material [file attachment]

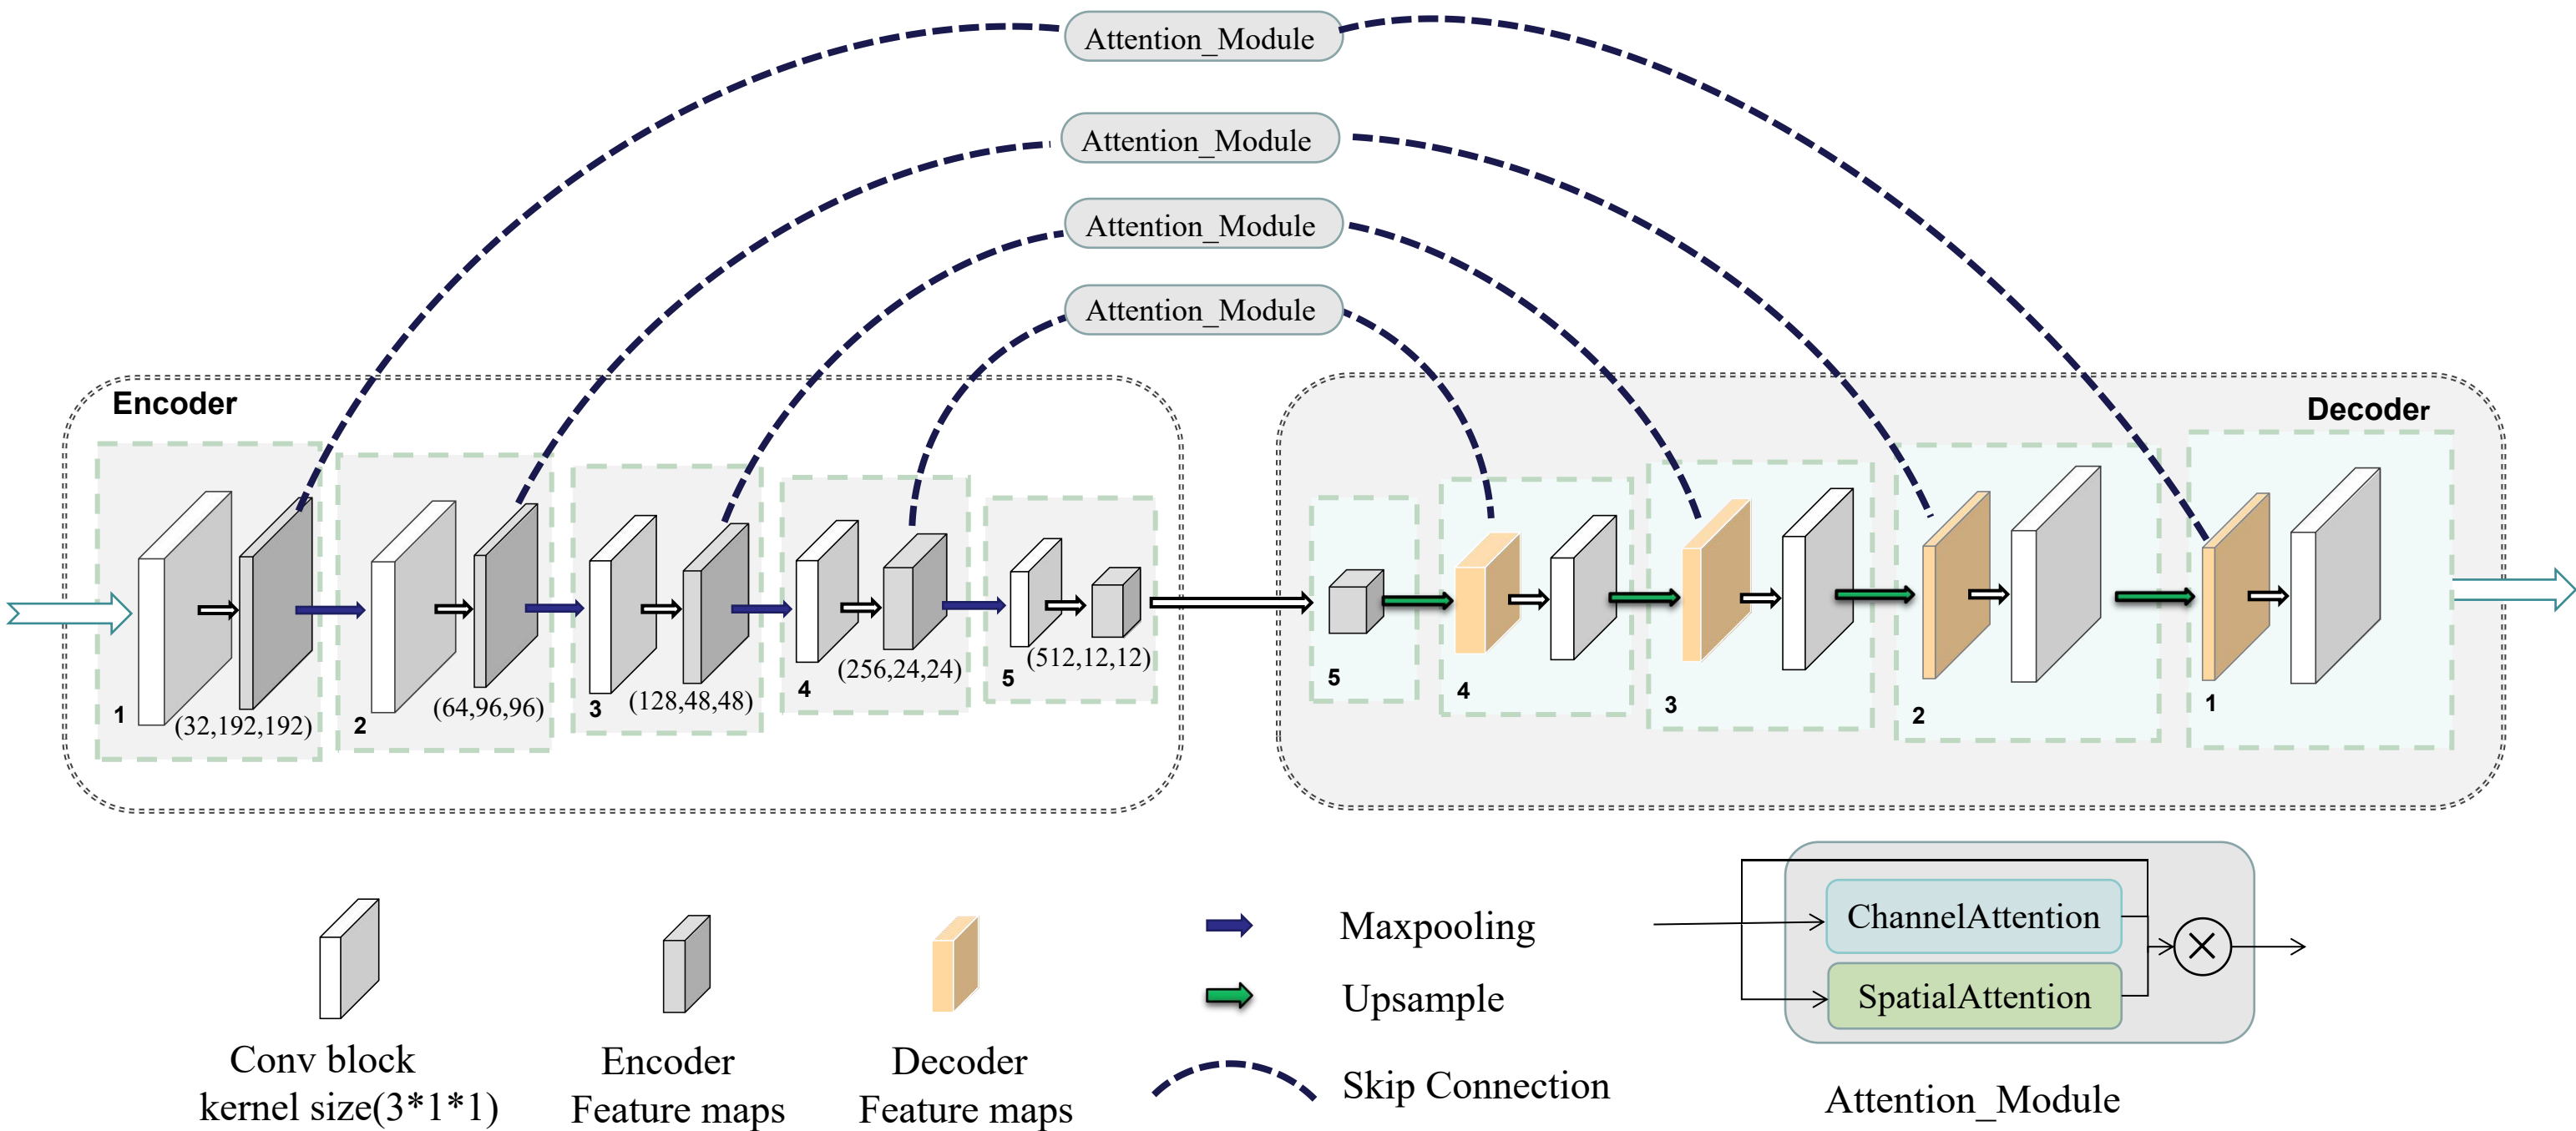

Supplement: supplementary_material [file attachment]

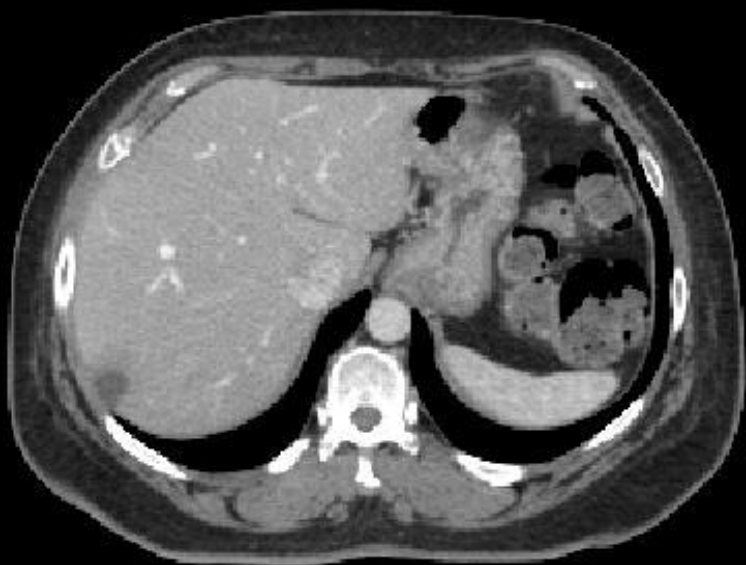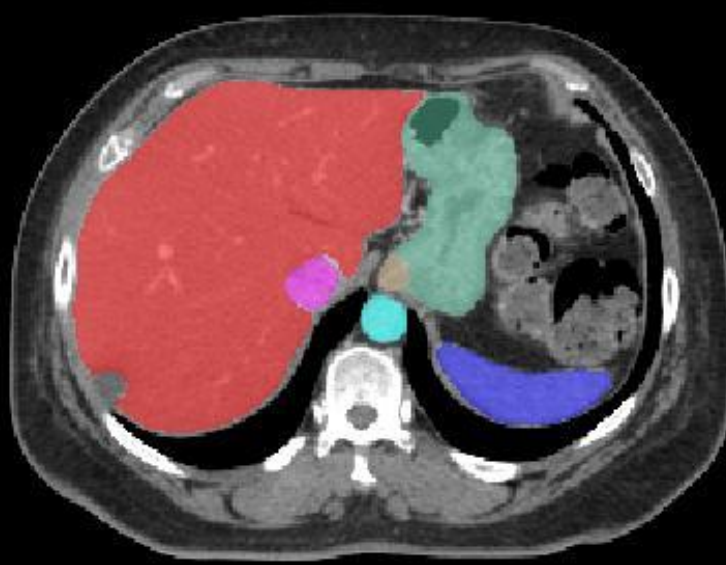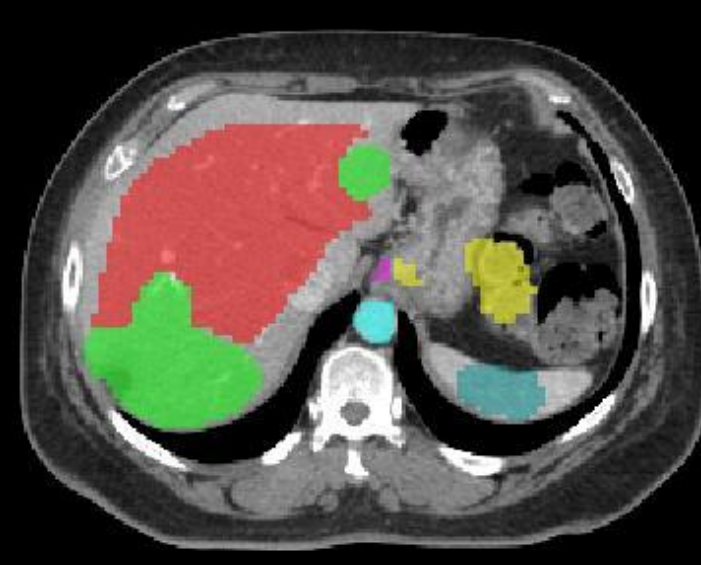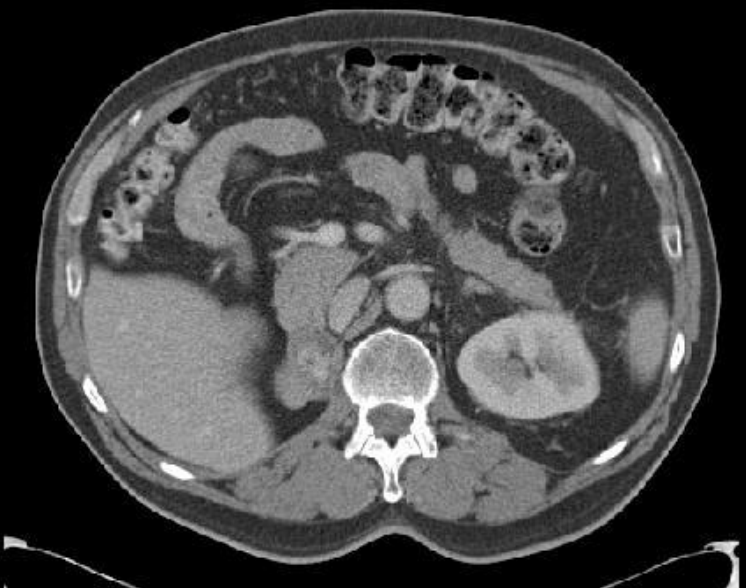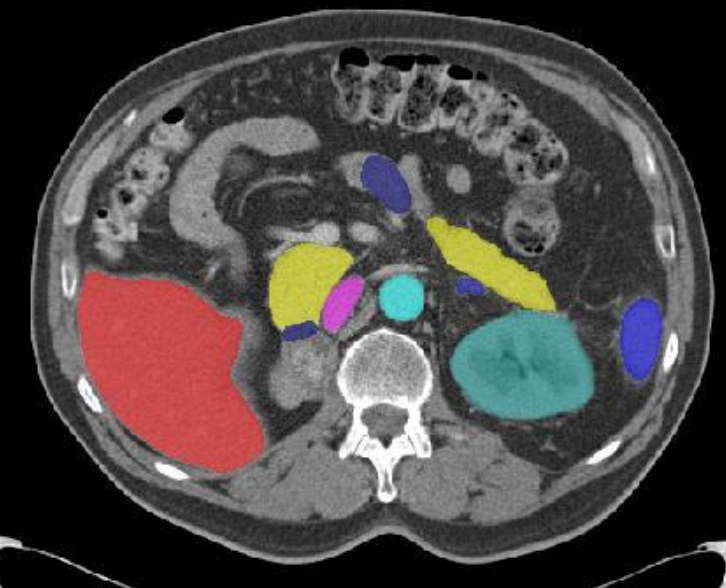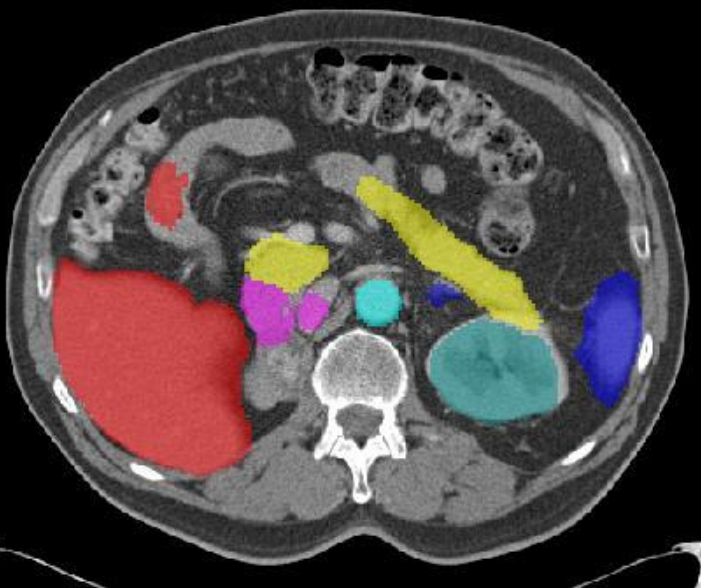

(a) Image

(b) Ground truth

(c) Segmentation

Supplement: supplementary_material [file attachment]

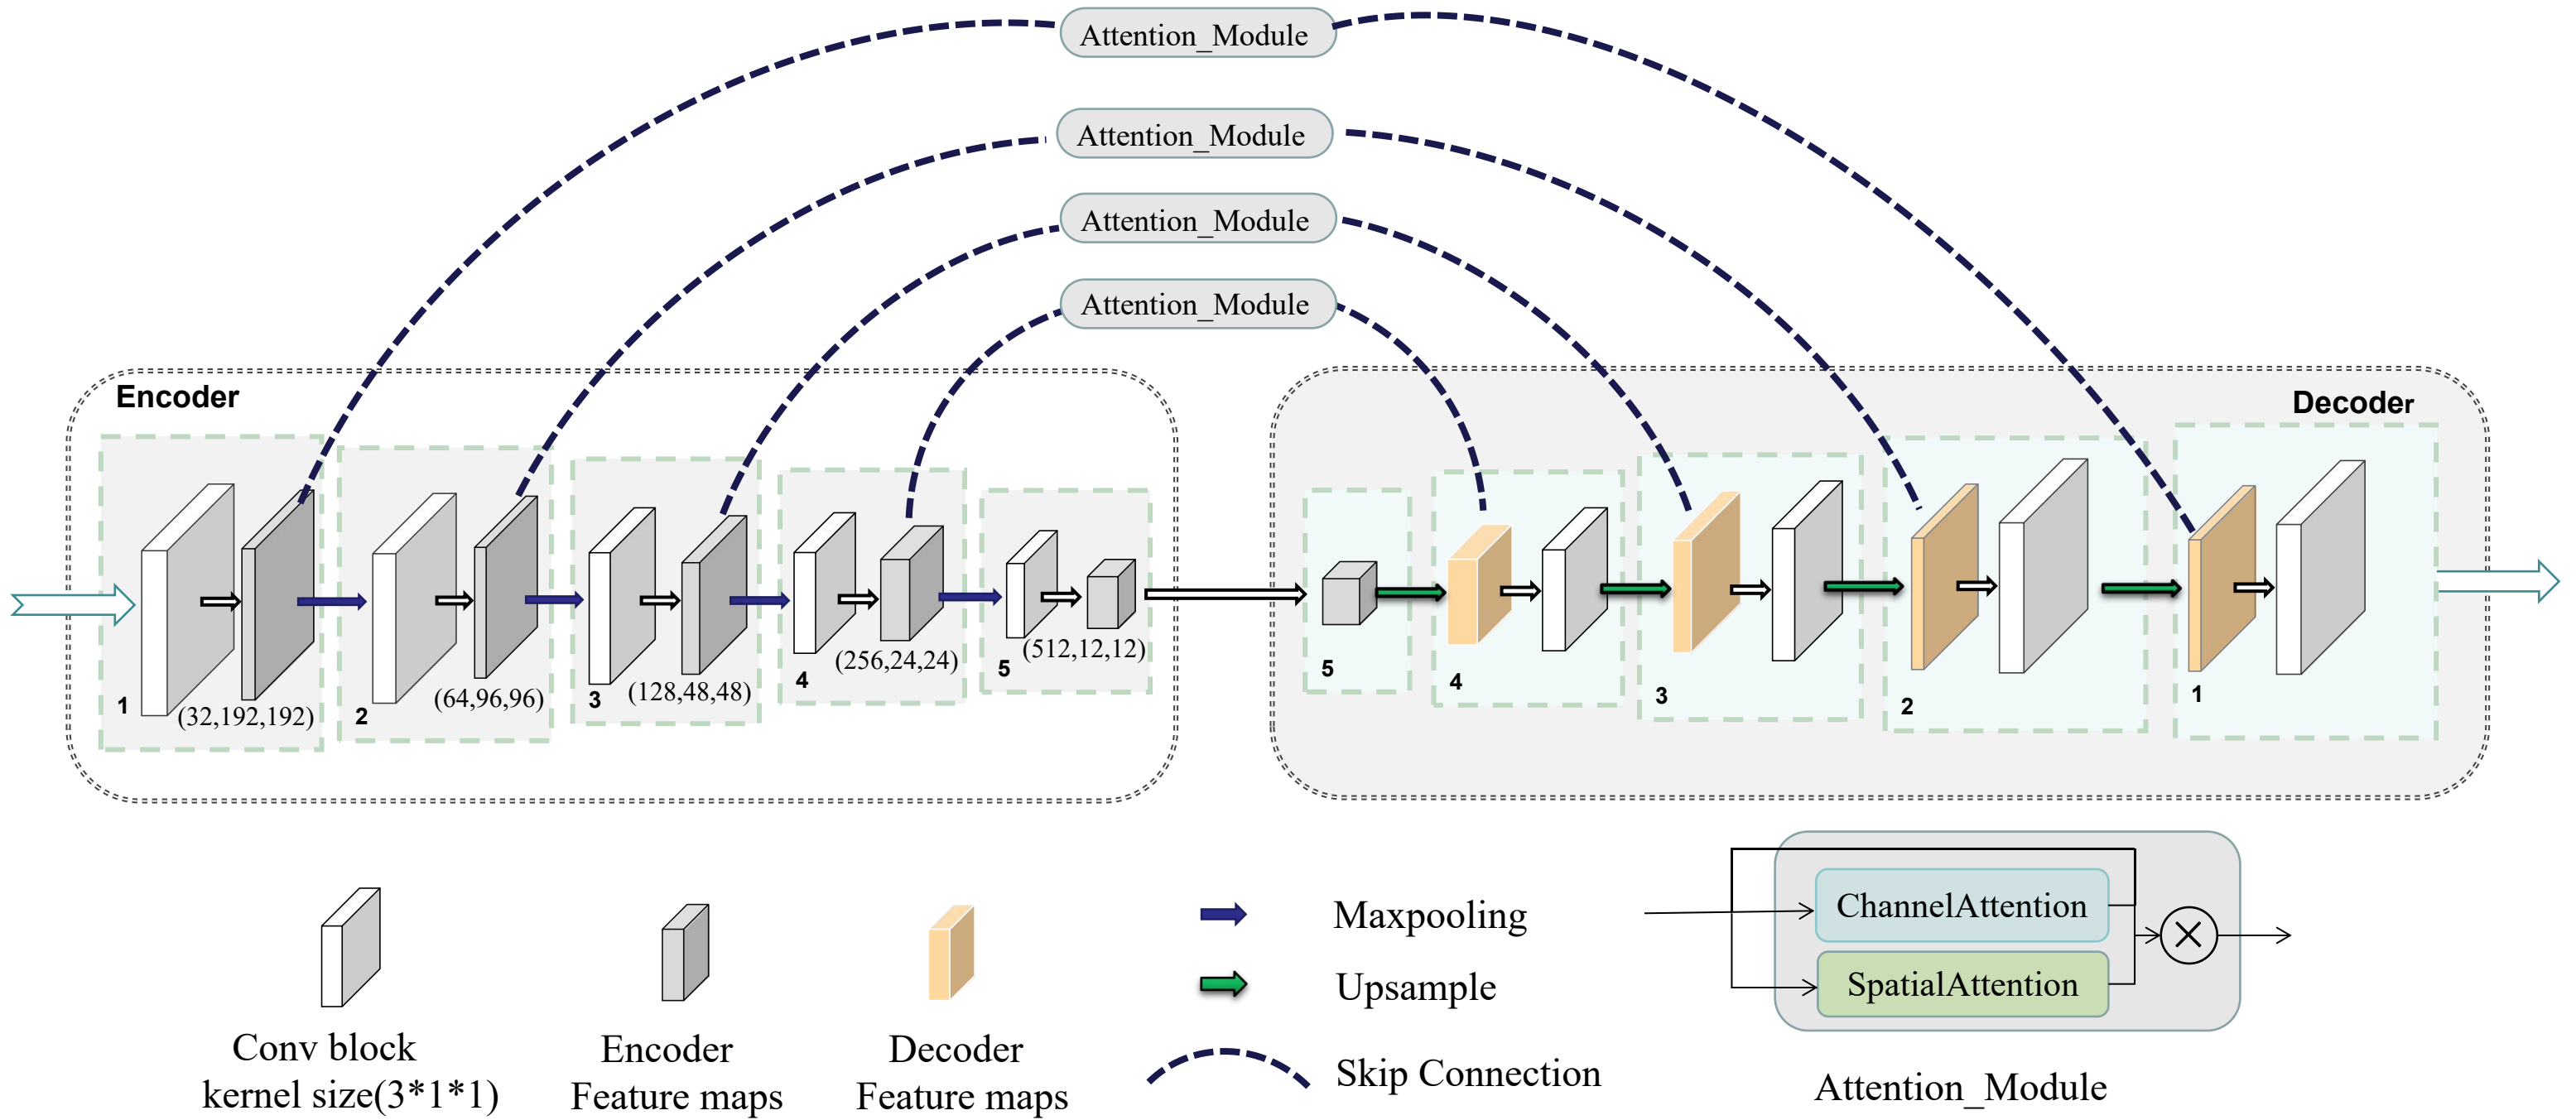

Supplement: supplementary_material [file attachment]

FLARETs\_0021\_0000

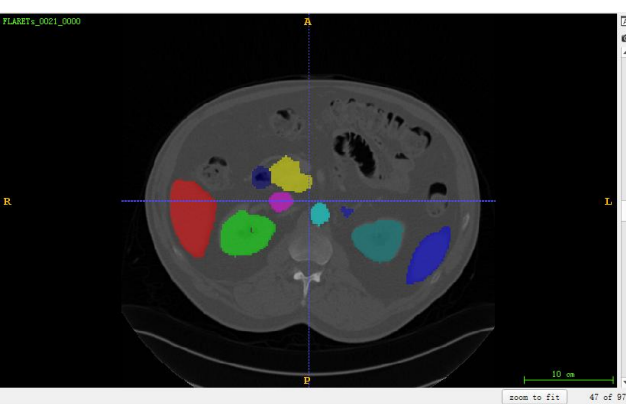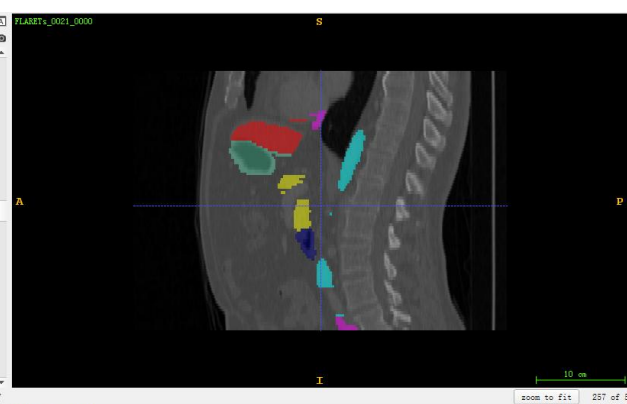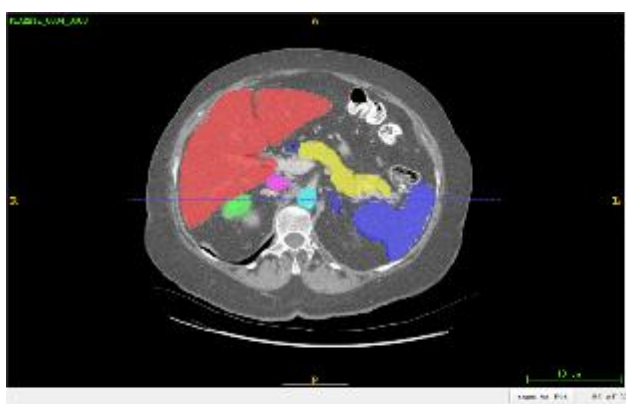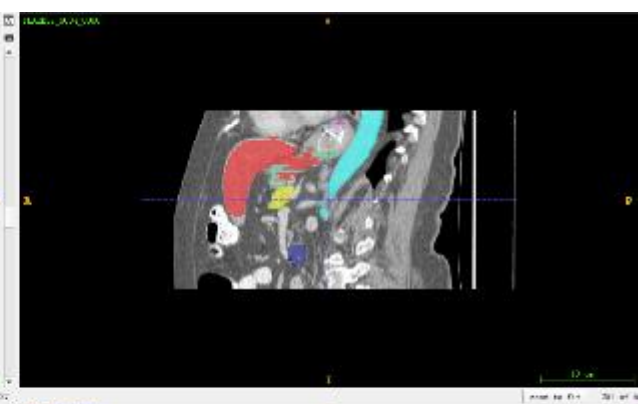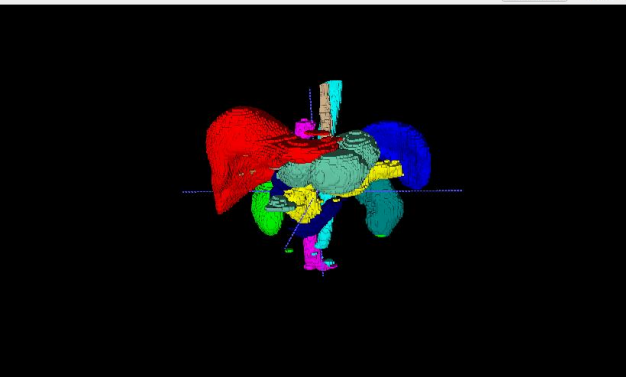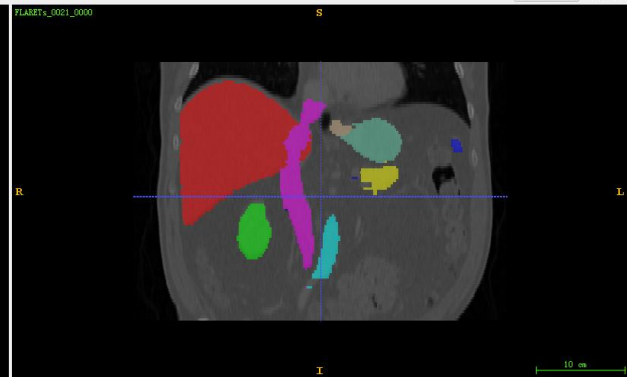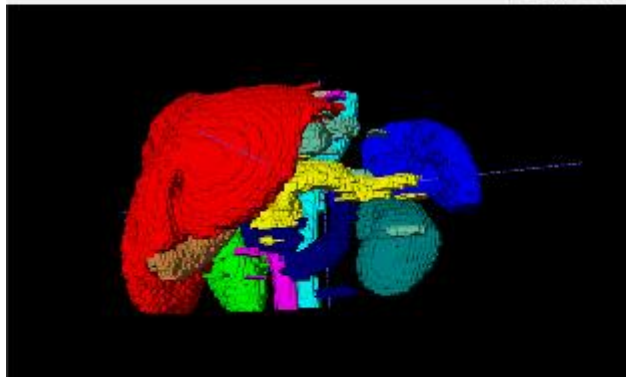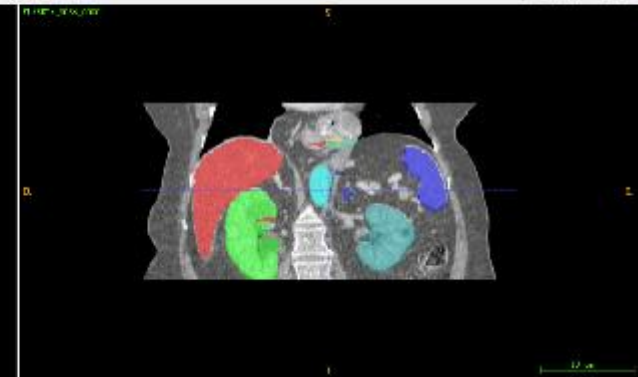

Supplement: supplementary_material [file attachment]

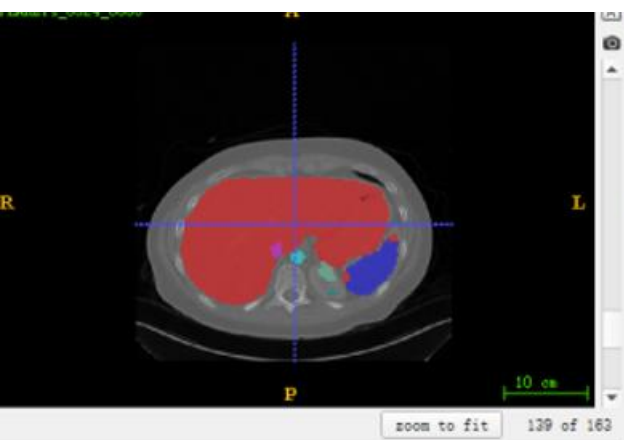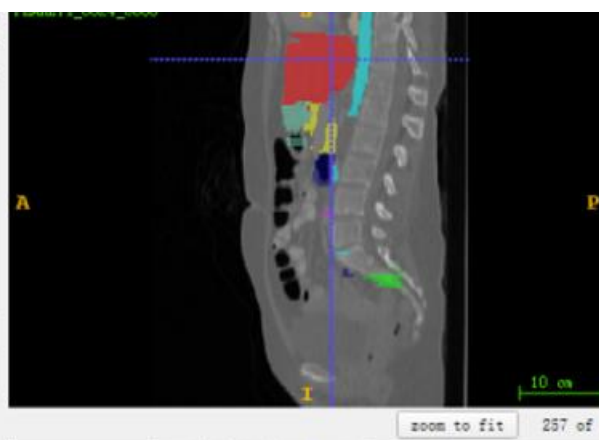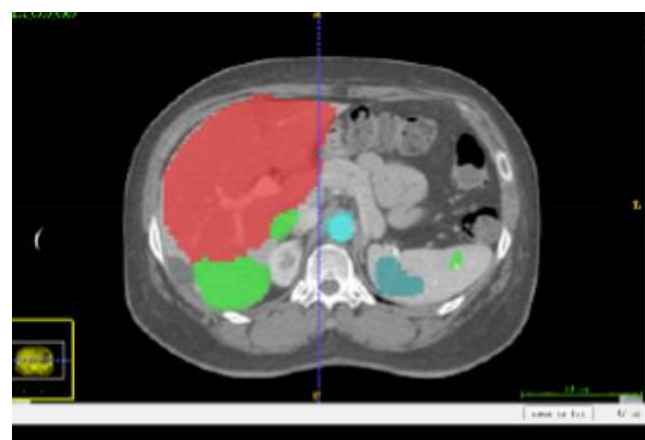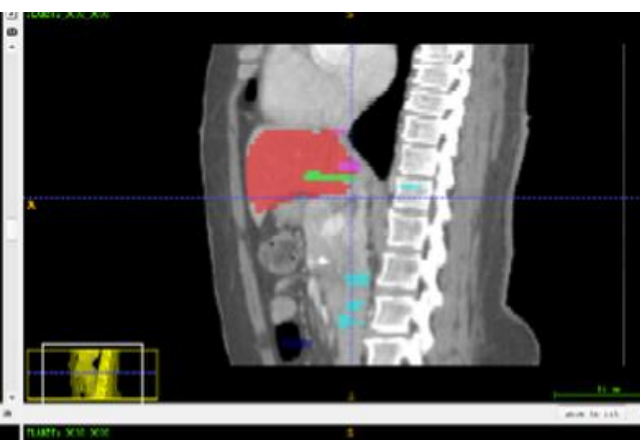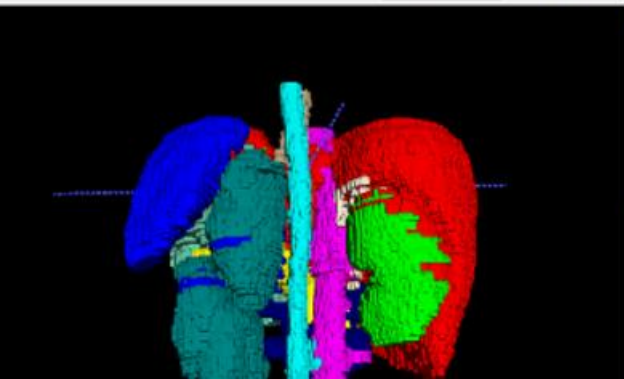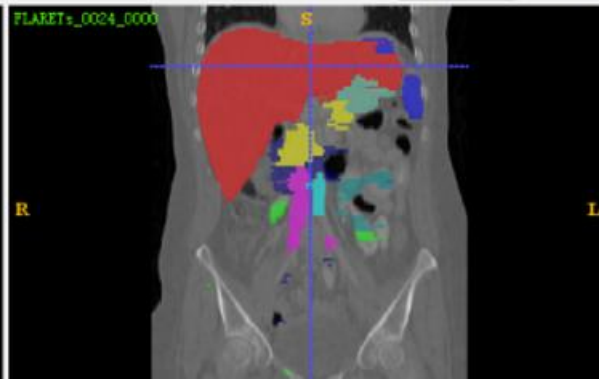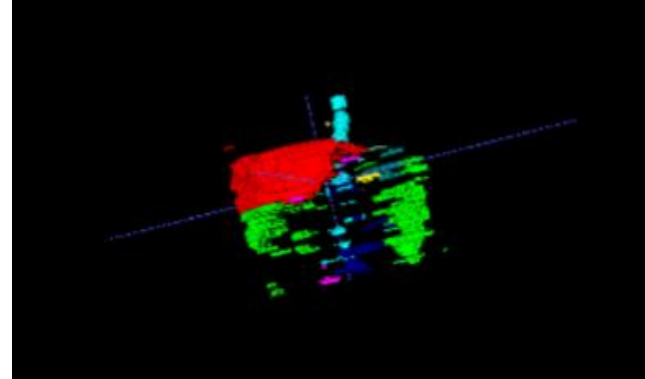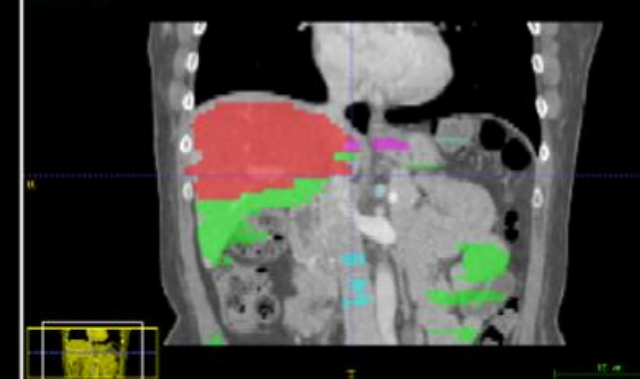

Supplement: supplementary_material [file attachment]

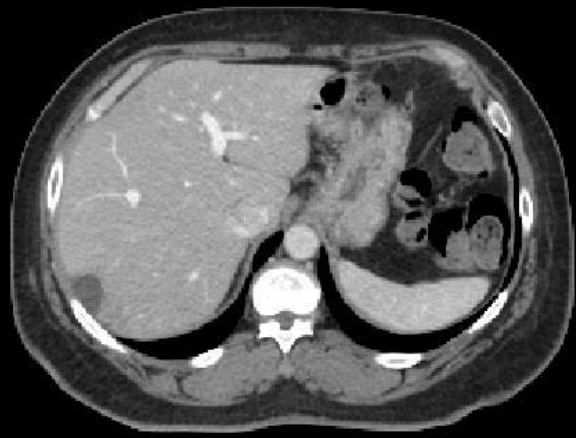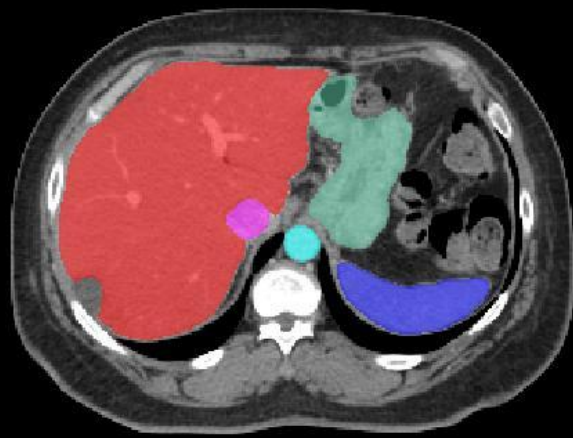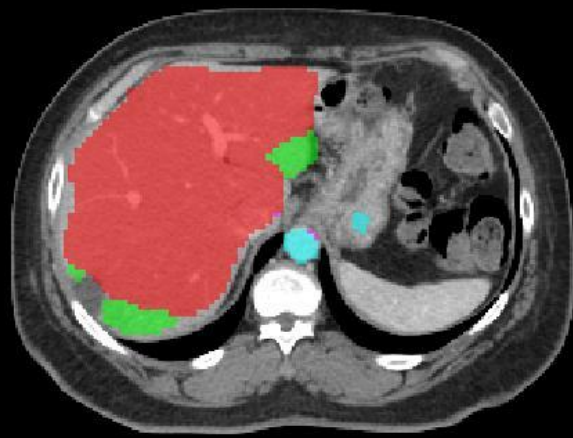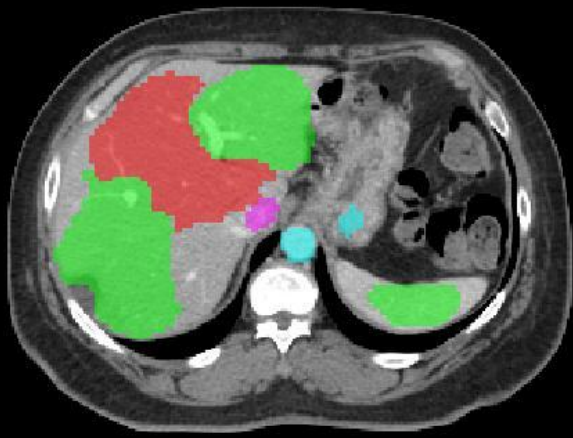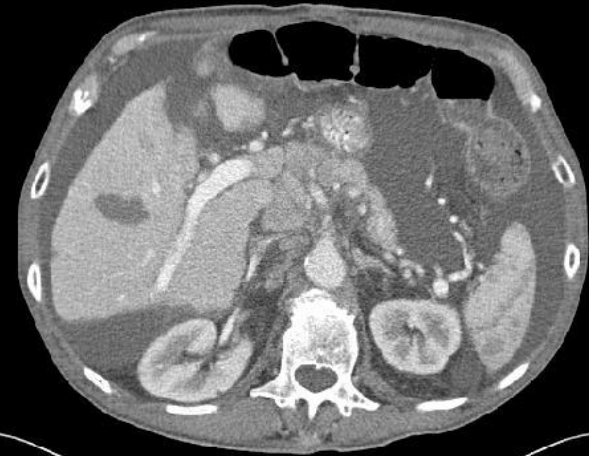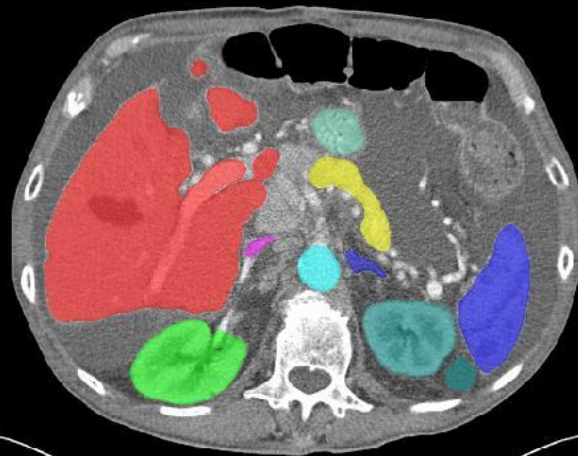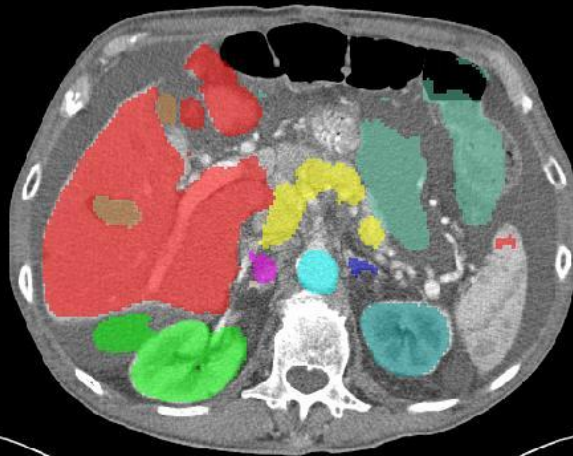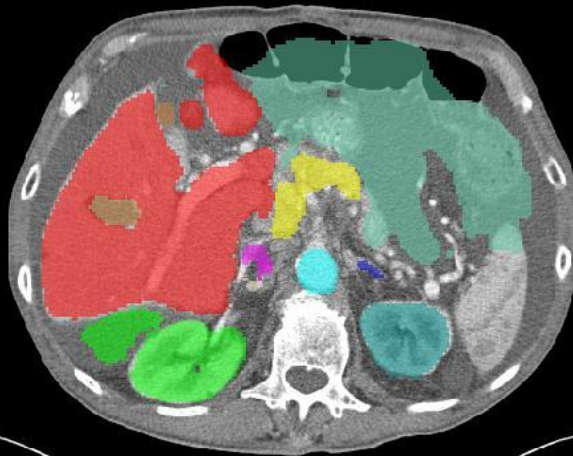

(a) Image

(b) Ground truth

(c) Semi-Supervised

(d) Supervised

Supplement: supplementary_material [file attachment]

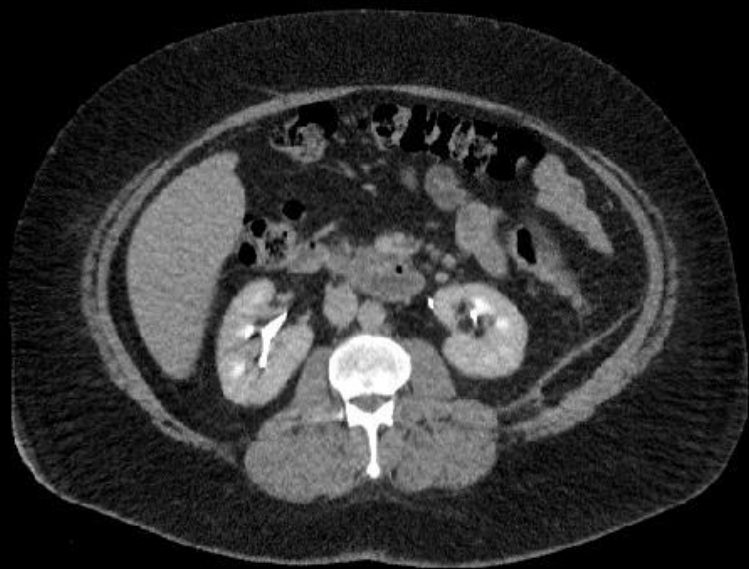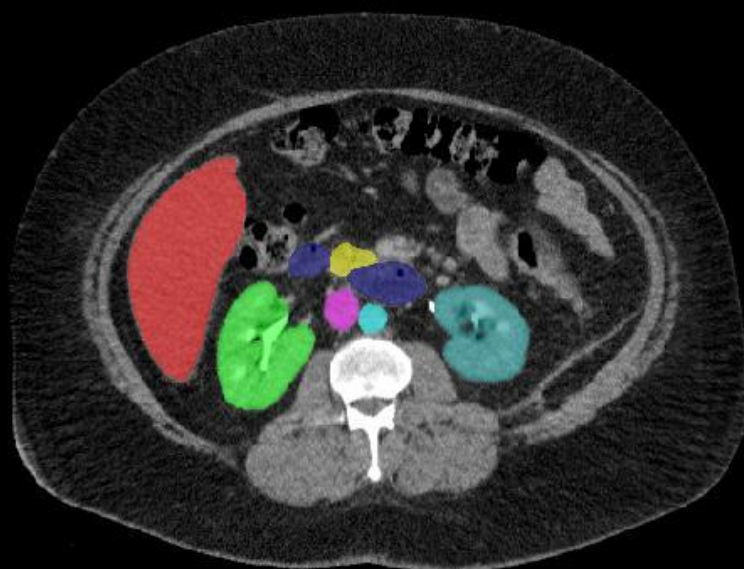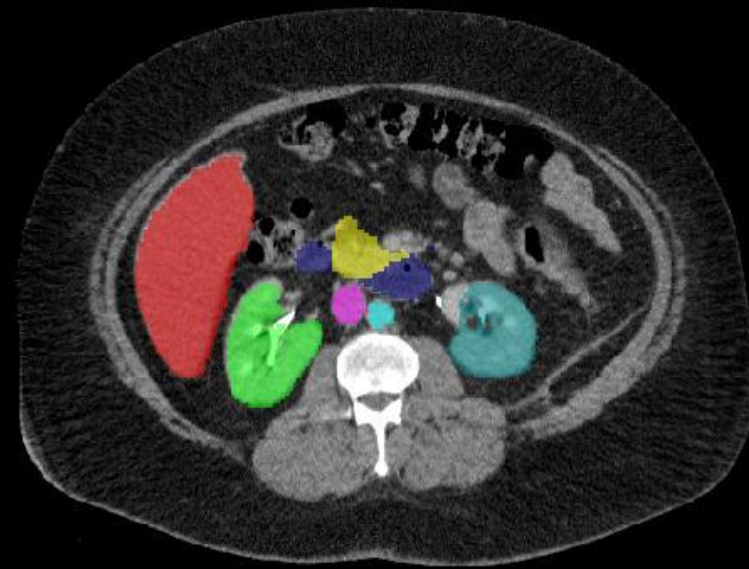

(a) Image

(b) Ground truth

(c) Segmentation

Supplement: supplementary_material [file attachment]
